# Supplementary material for: Acute effects of resistance exercise with blood flow restriction on cardiovascular response: a meta-analysis
Source: Atypon-hosted journal article supplement (doi:10.2217/cer-2021-0272), 2022-06-17
Supplement: appendix 1.doc [file appendix%201.doc]

**Appendix 1.** Search strategies

| **MEDLINE (until Jan 13, 2022)**  1. (blood flow restriction) OR blood flow occlusion) OR (kaatsu) OR (vascular restriction) OR (veinous occlusion) OR (venous occlusion)  2. (hemodynamic) OR (hemodynamics) OR (blood pressure) OR (heart rate) OR (cardiac output)  3. (resistance exercise) OR (resistance training) OR (strength exercise) OR (strength training)  4. (randomized controlled trial) OR (controlled trial) OR (controlled clinical trial) OR (clinical trial)  5. (animal) OR (animals)  6. 1 AND 2 AND 3 AND 4 NOT 5 |
| --- |
| **EMBASE (until Jan 13, 2022)**  1. (blood flow restriction) OR blood flow occlusion) OR (kaatsu) OR (vascular restriction) OR (veinous occlusion) OR (venous occlusion)  2. (hemodynamic) OR (hemodynamics) OR (blood pressure) OR (heart rate) OR (cardiac output)  3. (resistance exercise) OR (resistance training) OR (strength exercise) OR (strength training)  4. (randomized controlled trial) OR (controlled trial) OR (controlled clinical trial) OR (clinical trial)  5. (animal) OR (animals)  6. 1 AND 2 AND 3 AND 4 NOT 5 |
| **The Cochrane Library (until Jan 13, 2022)**  1. (blood flow restriction) OR blood flow occlusion) OR (vascular restriction) OR (veinous occlusion) OR (venous occlusion)  2. (hemodynamic) OR (hemodynamics) OR (blood pressure) OR (heart rate) OR (cardiac output)  3. (resistance exercise) OR (resistance training) OR (strength exercise) OR (strength training)  4. (randomized controlled trial) OR (controlled trial) OR (controlled clinical trial) OR (clinical trial)  5. (animal) OR (animals)  6. 1 AND 2 AND 3 AND 4 NOT 5 |
| **SciELO (until Jan 13, 2022)**  1. (blood flow restriction) OR blood flow occlusion) OR (kaatsu) OR (vascular restriction) OR (veinous occlusion) OR (venous occlusion)  2. (hemodynamic) OR (hemodynamics) OR (blood pressure) OR (heart rate) OR (cardiac output)  3. (resistance exercise) OR (resistance training) OR (strength exercise) OR (strength training)  4. (randomized controlled trial) OR (controlled trial) OR (controlled clinical trial) OR (clinical trial)  5. (animal) OR (animals)  6. 1 AND 2 AND 3 AND 4 NOT 5 |
| **CINAHL (until Jan 13, 2022)**  1. (blood flow restriction) OR blood flow occlusion) OR (kaatsu) OR (vascular restriction) OR (veinous occlusion) OR (venous occlusion)  2. (hemodynamic) OR (hemodynamics) OR (blood pressure) OR (heart rate) OR (cardiac output)  3. (resistance exercise) OR (resistance training) OR (strength exercise) OR (strength training)  4. (randomized controlled trial) OR (controlled trial) OR (controlled clinical trial) OR (clinical trial)  5. (animal) OR (animals)  6. 1 AND 2 AND 3 AND 4 NOT 5 |
| **PEDro (until Jan 13, 2022)**  Abstract and title: blood flow restriction; veinous occlusion; venous occlusion.  Method: clinical Trial |
|  |
