# Supplementary material for: Acute effects of resistance exercise with blood flow restriction on cardiovascular response: a meta-analysis
Source: Atypon-hosted journal article supplement (doi:10.2217/cer-2021-0272), 2022-06-17
Supplement: appendix 2.doc [file appendix%202.doc]

**Appendix 2. Funnel plot analysis**

**
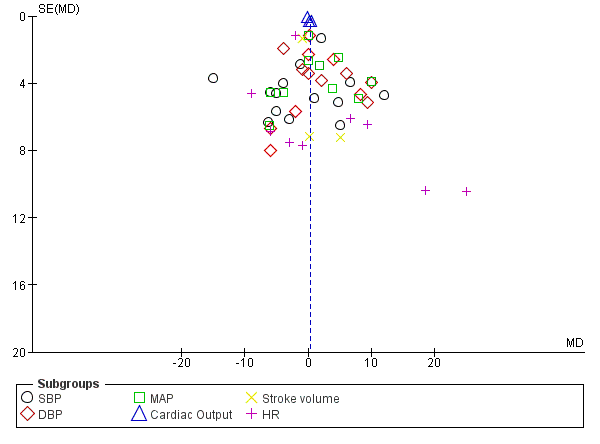
**

**Figure 1.** Funnel plot comparison between LLRT-BFR and LLRT in the acute effect.

**Legend:** LLRT-BFR: low-load resistance training associated with blood flow restriction; LLRT: low-load resistance training; SBP: systolic blood pressure; DBP: diastolic blood pressure; MAP: mean arterial pressure; HR: heart rate.

**
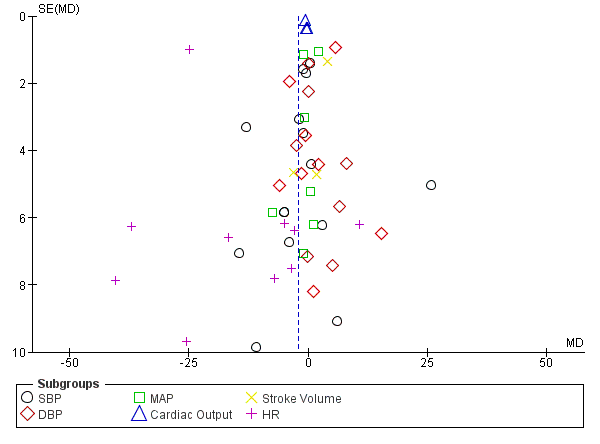
**

**Figure 2.** Funnel plot comparison between LLRT-BFR and HLRT in the acute effect.

**Legend:** LLRT-BFR: low-load resistance training associated with blood flow restriction; HLRT: high-load resistance training; SBP: systolic blood pressure; DBP: diastolic blood pressure; MAP: mean arterial pressure; HR: heart rate.

**
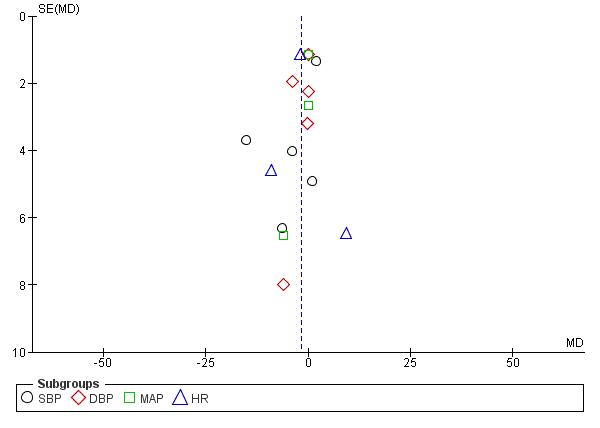
**

**Figure 3.** Funnel plot comparison between LLRT-BFR and LLRT for lower limbs in the acute effect.

**Legend:** LLRT-BFR: low-load resistance training associated with blood flow restriction; LLRT: low-load resistance training; SBP: systolic blood pressure; DBP: diastolic blood pressure; MAP: mean arterial pressure; HR: heart rate.

**
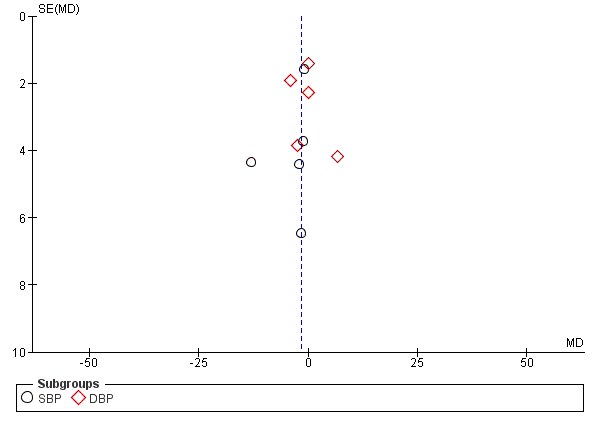
**

**Figure 4.** Funnel plot comparison between LLRT-BFR and HLRT for lower limbs in the acute effect.

**Legend:** LLRT-BFR: low-load resistance training associated with blood flow restriction; HLRT: high-load resistance training; SBP: systolic blood pressure; DBP: diastolic blood pressure.

**
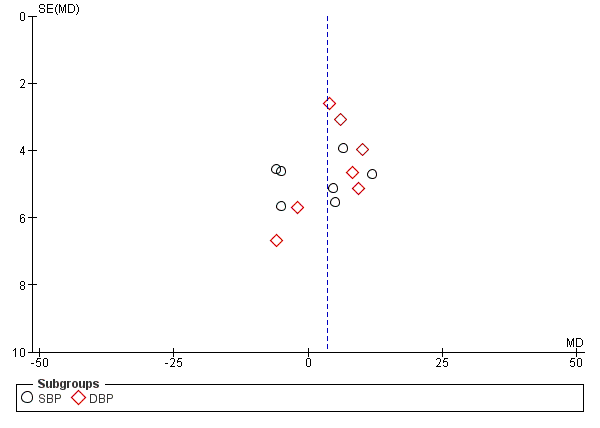
**

**Figure 5.** Funnel plot comparison between LLRT-BFR and LLRT for upper limbs in the acute effect.

**Legend:** LLRT-BFR: low-load resistance training associated with blood flow restriction; LLRT: low-load resistance training; SBP: systolic blood pressure; DBP: diastolic blood pressure.

**
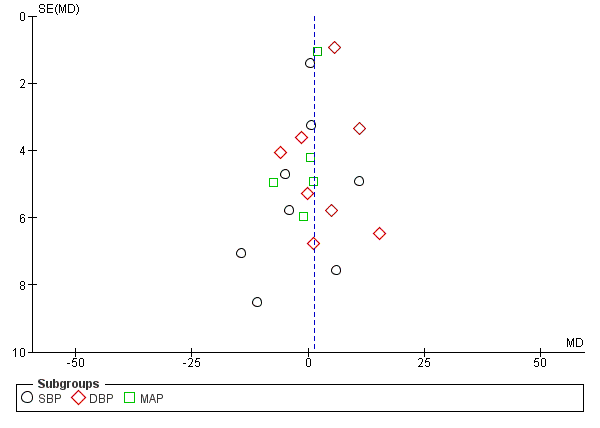
**

**Figure 6.** Funnel plot comparison between LLRT-BFR and HLRT for upper limbs in the acute effect.

**Legend:** LLRT-BFR: low-load resistance training associated with blood flow restriction; HLRT: high-load resistance training; SBP: systolic blood pressure; DBP: diastolic blood pressure; MAP: mean arterial pressure.

**
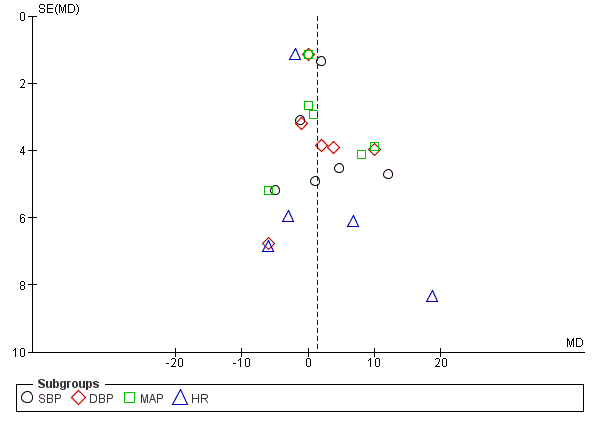
**

**Figure 7.** Funnel plot comparison between LLRT-BFR and LLRT with intermittent BFR in the acute effect.

**Legend:** LLRT-BFR: low-load resistance training associated with blood flow restriction; LLRT: low-load resistance training; SBP: systolic blood pressure; DBP: diastolic blood pressure; MAP: mean arterial pressure; HR: heart rate.

**
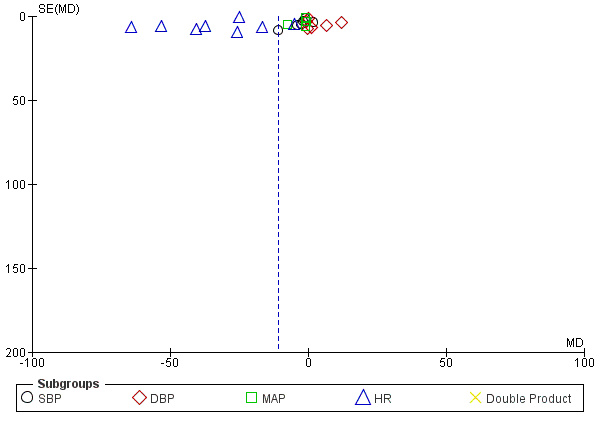
**

**Figure 8.** Funnel plot comparison between LLRT-BFR and HLRT with intermittent BFR in the acute effect.

**Legend:** LLRT-BFR: low-load resistance training associated with blood flow restriction; HLRT: high-load resistance training; SBP: systolic blood pressure; DBP: diastolic blood pressure; MAP: mean arterial pressure; HR: heart rate.

**
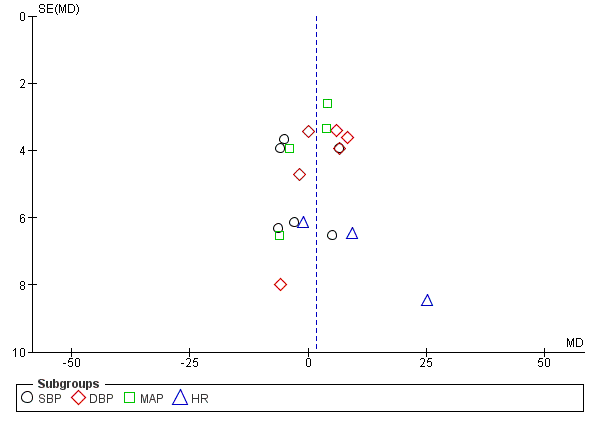
**

**Figure 9.** Funnel plot comparison between LLRT-BFR and LLRT with continuous BFR in the acute effect.

**Legend:** LLRT-BFR: low-load resistance training associated with blood flow restriction; LLRT: low-load resistance training; SBP: systolic blood pressure; DBP: diastolic blood pressure; MAP: mean arterial pressure; HR: heart rate.

**
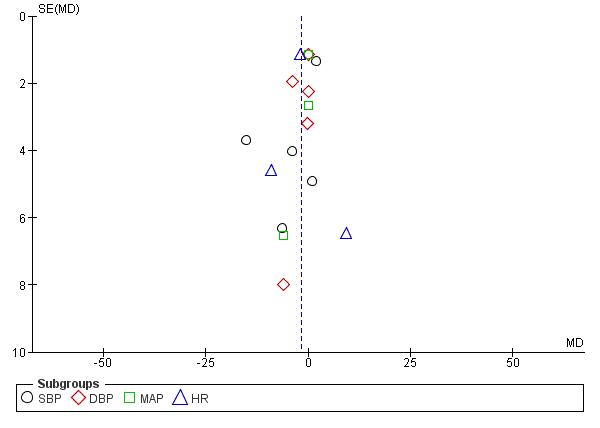
**

**Figure 10.** Funnel plot comparison between LLRT-BFR and HLRT with continuous BFR in the acute effect.

**Legend:** LLRT-BFR: low-load resistance training associated with blood flow restriction; HLRT: high-load resistance training; SBP: systolic blood pressure; DBP: diastolic blood pressure; MAP: mean arterial pressure; HR: heart rate.
