# Supplementary material for: Acute effects of resistance exercise with blood flow restriction on cardiovascular response: a meta-analysis
Source: Atypon-hosted journal article supplement (doi:10.2217/cer-2021-0272), 2022-06-17
Supplement: appendix 4.doc [file appendix%204.doc]

**Appendix 4. Assessment of the quality of evidence through the grade system**

| **Table 1.**  Quality of evidence of acute effects in the comparison between LLRT-BFR vs HLRT and LLRT-BFR vs. LLRT. | | | | | | | | | | | | | | | | | | | | | |  |
| --- | --- | --- | --- | --- | --- | --- | --- | --- | --- | --- | --- | --- | --- | --- | --- | --- | --- | --- | --- | --- | --- | --- |
|  | | | | | | | | | | | | | | | | | | | | | |  |
| **Studies** | **Quality of Evidence** | | | | | **Number of participants** | | | | | | | **Effect** | | | **Overall quality of evidence** | | | |  | | |
|  | **Risk of bias** | | **Inconsistency** | **Inaccuracy** | **Indirect evidence** | | **LLRT-BFR** | | | **LLRT** | | | | **MD or SMD (95% CI)** | | |  | | | | |  |
| ***SBP*** |  | | | | | | | | | | | | | | | | | | | | | |
| **mmHg** | Serious a | | Serious b | Serious c | No serious | | 211 | | | 155 | | | | MD= **-1.03 mmHg**  (-4.54, 2.49) | | | ⨁◯◯◯◯  VERY LOW | | | | |  |
| ***DBP*** |  | | | | | | | | | | | | | | | | | | | | | |
| **mmHg** | Serious a | | No serious | Serious c | No serious | | 211 | | | 155 | | | | MD= **1.41 mmHg**  (-0.85, 3.86) | | | ⨁⨁◯◯  LOW | | | | |  |
| ***MAP*** |  | | | | | | | | | | | | | | | | | | | | | |
| **mmHg** | Serious a | | No serious | Serious c | No serious | | 129 | | | 112 | | | | MD= **1.57 mmHg** (-1.07, 4.22) | | | ⨁⨁◯◯  LOW | | | | |  |
| ***Cardiac output*** |  | | | | | | | | | | | | | | | | | | | | | |
| **[(l min-1) m-2]** | Serious a | | No serious | Serious c | No serious | | 34 | | | 22 | | | | MD= -**0.02 [(l min- 1) m-2]**  (-0.36, 0.32) | | | ⨁⨁◯◯  LOW | | | | |  |
| S***troke volume*** |  | | | | | | | | | | | | | | | | | | | | | |
| **[(ml bat-1) m-2]** | Serious a | | No serious | Serious c | No serious | | 34 | | | 22 | | | | MD= -**0.77 [(ml bat-1) m-2]**  (-3.31, 1.77) | | | ⨁⨁◯◯  LOW | | | | |  |
| ***HR*** |  | |  |  | |  | | | |  | | | |  | | |  | | | |  | |
| **bpm** | Serious a | | Serious b | Serious c | No serious | 114 | | | | 97 | | | | DM= **1.50 bpm** (4.07, 7.07) | | | ⨁◯◯◯  VERY LOW | | | |  | |
| **Studies** | **Quality of Evidence** | | | | | **Number of participants** | | | | | | | **Effect** | | | **Overall quality of evidence** | | | |  | | |
|  | **Risk of bias** | | **Inconsistency** | **Inaccuracy** | **Indirect evidence** | | | **LLRT-BFR** | | | **HLRT** | | | | **MD ou SMD (95% CI)** | | |  | | | | |
| ***SBP*** |  | | | | | | | | | | | | | | | | | | | | | |
| **mmHg** | Serious a | Serious b | | Serious c | No serious | | | 217 | 154 | | | MD= **-1.09 mmHg** (-4.48, 2.30) | | | | ⨁◯◯◯  VERY LOW | | |  | | | |
| ***DBP*** |  |  | |  |  | | |  |  | | |  | | | |  | | |  | | | |
| **mmHg** | Serious a | No serious | | Serious c | No serious | | | 217 | 154 | | | MD= **1.25 mmHg** (-1.45, 3.95) | | | | ⨁⨁◯◯  LOW | | |  | | | |
| ***MAP*** |  |  | |  |  | | |  |  | | |  | | | |  | | |  | | | |
| **mmHg** | Serious a | No serious | | Serious c | No serious | | | 93 | 71 | | | MD= **0.40 mmHg** (-1.02, 1.82) | | | | ⨁⨁◯◯  LOW | | |  | | | |
| ***Cardiac output*** |  |  | |  |  | | |  |  | | |  | | | |  | | |  | | | |
| **[(l min-1) m-2]** | Serious a | No serious | | Serious c | No serious | | | 34 | 22 | | | MD= -**0.63 [(l min-1) m-2]** (-0.86, -0,40) | | | | ⨁⨁◯◯  LOW | | |  | | | |
| S***troke volume*** |  |  | |  |  | | |  |  | | |  | | | |  | | |  | | | |
| **[(ml bat-1) m-2]** | Serious a | No serious | | Serious c | No serious | | | 34 | 22 | | | MD= **2.81 [(ml bat-1) m-2]** (-0.57, 6.19) | | | | ⨁⨁◯◯  LOW | | |  | | | |
| ***HR*** |  |  | |  |  | | |  |  | | |  | | | |  | | |  | | | |
| **bpm** | Serious a | Serious b | | Serious c | No serious | | | 122 | 110 | | | MD= **-15.19 mmHg** (-24.70, -5.69) | | | | ⨁◯◯◯  VERY LOW | | |  | | | |
| **CI: Confidence interval; DM: Mean difference; DMP: Standardized mean difference; SD: Standardized difference*;***  **a More than 25% of study participants with low methodological quality (PEDro score <6 points);**  **b I2> 50%;**  **c <400 participants combined for each outcome;**  **LOW QUALITY: It is very likely that more research will have an important impact on our confidence in the estimate of the effect and may change the estimate.**  **VERY LOW QUALITY: We are very uncertain about the estimated effect.** | | | | | | | | | | | | | | | | | | |  | | | |

| **Table 2.** Quality of the evidence of acute effects in lower limb when comparing between LLRT-BFR vs HLRT and LLRT-BFR vs. LLRT. | | | | | | | | | | | | | | | | | | | | |  |
| --- | --- | --- | --- | --- | --- | --- | --- | --- | --- | --- | --- | --- | --- | --- | --- | --- | --- | --- | --- | --- | --- |
|  | | | | | | | | | | | | | | | | | | | | |  |
| **Studies** | **Quality of Evidence** | | | | | **Number of participants** | | | | | | | **Effect** | | | **Overall quality of evidence** | | | |  | |
|  | **Risk of bias** | | **Inconsistency** | **Inaccuracy** | **Indirect evidence** | | **LLRT-BFR** | | | **LLRT** | | | | **MD or SMD (95% CI)** | | |  | | | |  |
| ***SBP*** |  | | | | | | | | | | | | | | | | | | | | |
| **mmHg** | Serious a | | Serious b | Serious c | No serious | | 84 | | | 64 | | | | MD= **-4.22 mmHg** (-11.37, 2.94) | | | ⨁◯◯◯  VERY LOW | | | |  |
| ***DBP*** |  | | | | | | | | | | | | | | | | | | | | |
| **mmHg** | Serious a | | No serious | Serious c | No serious | | 84 | | | 64 | | | | MD= -**0.86 mmHg** (-2.55, 0.83) | | | ⨁⨁◯◯  LOW | | | |  |
| ***MAP*** |  | | | | | | | | | | | | | | | | | | | | |
| **mmHg** | Serious a | | No serious | Serious c | No serious | | 39 | | | 43 | | | | MD= -**0.16 mmHg** (-2.19, 1.87) | | | ⨁◯◯◯  VERY LOW | | | |  |
| ***HR*** |  | | | | | | | | | | | | | | | | | | | | |
| **bpm** | Serious a | | Serious b | Serious c | No serious | | 39 | | | 43 | | | | MD= -**1.75 bpm** (-8.96, 5.46) | | | ⨁◯◯◯  VERY LOW | | | |  |
| **Studies** | **Quality of Evidence** | | | | | **Number of participants** | | | | | | | **Effect** | | | **Overall quality of evidence** | | | |  | |
|  | **Risk of bias** | | **Inconsistency** | **Inaccuracy** | **Indirect evidence** | | | **LLRT-BFR** | | | **HLRT** | | | | **MD ou SMD (95% CI)** | | |  | | | |
| ***SBP*** |  | | | | | | | | | | | | | | | | | | | | |
| **mmHg** | Serious a | No serious | | Serious c | No serious | | | 87 | 63 | | | MD= **-3.19** **mmHg** (-7.35, 0.97) | | | | ⨁⨁◯◯  LOW | | |  | | |
| ***SBP*** |  |  | |  |  | | |  |  | | |  | | | |  | | |  | | |
| **mmHg** | Serious a | No serious | | Serious c | No serious | | | 87 | 63 | | | MD= **-0.73 mmHg** (-0.73, 1.91) | | | | ⨁⨁◯◯  LOW | | |  | | |
| **CI: Confidence interval; DM: Mean difference; DMP: Standardized mean difference; SD: Standardized difference*;***  **a More than 25% of study participants with low methodological quality (PEDro score <6 points);**  **b I2> 50%;**  **c <400 participants combined for each outcome;**  **LOW QUALITY: It is very likely that more research will have an important impact on our confidence in the estimate of the effect and may change the estimate.**  **VERY LOW QUALITY: We are very uncertain about the estimated effect.** | | | | | | | | | | | | | | | | | | |  | | |
|  | | | | | | | | | | | | | | | | | | |  | | |

| **Table 3.** Quality of evidence of acute effects in upper limbs when comparing between LLRT-BFR vs HLRT and LLRT-BFR vs. LLRT. | | | | | | | | | | | | | | | | | | | | | |
| --- | --- | --- | --- | --- | --- | --- | --- | --- | --- | --- | --- | --- | --- | --- | --- | --- | --- | --- | --- | --- | --- |
|  | **Risk of bias** | | **Inconsistency** | **Inaccuracy** | **Indirect evidence** | | **LLRT-BFR** | | | **LLRT** | | | | **MD or SMD (95% CI)** | | |  | | | |  |
| ***SBP*** |  | | | | | | | | | | | | | | | | | | | | |
| **mmHg** | Serious a | | No serious | Serious c | No serious | | 83 | | | 67 | | | | MD= **1.86 mmHg** (-3.48, 7.21) | | | ⨁⨁◯◯  LOW | | | |  |
| ***DBP*** |  | | | | | | | | | | | | | | | | | | | | |
| **mmHg** | Serious a | | No serious | Serious c | No serious | | 83 | | | 67 | | | | MD= **5.25 mmHg** (1.94, 8.57) | | | ⨁⨁◯◯  LOW | | | |  |
| **Studies** | **Quality of Evidence** | | | | | **Number of participants** | | | | | | | **Effect** | | | **Overall quality of evidence** | | | |  | |
|  | **Risk of bias** | | **Inconsistency** | **Inaccuracy** | **Indirect evidence** | | | **LLRT-BFR** | | | **HLRT** | | | | **MD or SMD (95% CI)** | | |  | | | |
| ***SBP*** |  | | | | | | | | | | | | | | | | | | | | |
| **mmHg** | Serious a | No serious | | Serious c | No serious | | | 106 | 109 | | | MD= **-0.70 mmHg** (-4.97, 3.57) | | | | ⨁⨁◯◯  LOW | | |  | | |
| ***DBP*** |  |  | |  |  | | |  |  | | |  | | | |  | | |  | | |
| **mmHg** | Serious a | Serious b | | Serious c | No serious | | | 106 | 109 | | | MD= **3.65 mmHg** (-0.56, 7.86) | | | | ⨁◯◯◯  VERY LOW | | |  | | |
| ***MAP*** |  |  | |  |  | | |  |  | | |  | | | |  | | |  | | |
| **mmHg** | Serious a | No serious | | Serious c | No serious | | | 59 | 59 | | | DM= **1.44 mmHg**  (-0.45, 3.32) | | | | ⨁⨁◯◯  LOW | | |  | | |
| **CI: Confidence interval; DM: Mean difference; DMP: Standardized mean difference; SD: Standardized difference*;***  **a More than 25% of study participants with low methodological quality (PEDro score <6 points);**  **b I2> 50%;**  **c <400 participants combined for each outcome;**  **LOW QUALITY: It is very likely that more research will have an important impact on our confidence in the estimate of the effect and may change the estimate.**  **VERY LOW QUALITY: We are very uncertain about the estimated effect.** | | | | | | | | | | | | | | | | | | |  | | |
|  | | | | | | | | | | | | | | | | | | |  | | |

| **Table 4.**  Quality of evidence for intermittent BRF applications between LLRT-BFR vs HLRT and LLRT-BFR vs. LLRT. | | | | | | | | | | | | | | | | | | | | | |  |
| --- | --- | --- | --- | --- | --- | --- | --- | --- | --- | --- | --- | --- | --- | --- | --- | --- | --- | --- | --- | --- | --- | --- |
|  | | | | | | | | | | | | | | | | | | | | | |  |
| **Studies** | **Quality of Evidence** | | | | | **Number of participants** | | | | | | | | **Effect** | | | **Overall quality of evidence** | | | |  | |
|  | **Risk of bias** | | **Inconsistency** | **Inaccuracy** | **Indirect evidence** | | **LLRT-BFR** | | | | **LLRT** | | | | **MD or SMD (95% CI)** | | |  | | | |  |
| ***SBP*** |  | | | | | | | | | | | | | | | | | | | | | |
| **mmHg** | Serious a | | No serious | Serious c | No serious | | 87 | | | | 87 | | | | MD= **2.02 mmHg**  (-1,45, 5.49) | | | ⨁⨁◯◯  LOW | | | |  |
| ***DBP*** |  | | | | | | | | | | | | | | | | | | | | | |
| **mmHg** | Serious a | | No serious | Serious c | No serious | | 87 | | | | 87 | | | | MD= **1.53 mmHg**  (-1.68, 4.74) | | | ⨁⨁◯◯  LOW | | | |  |
| ***MAP*** |  | | | | | | | | | | | | | | | | | | | | | |
| **mmHg** | Serious a | | No serious | Serious c | No serious | | 87 | | | | 87 | | | | MD= **1.85 mmHg** (-1.60, 5.31) | | | ⨁⨁◯◯  LOW | | | |  |
| ***HR*** |  | |  |  | |  | | | |  | | | |  | | |  | | | |  | |
| **bpm** | Serious a | | Serious b | Serious c | No serious | 64 | | | | 64 | | | | MD= **1.02 bpm** (-5.37, 7.41) | | | ⨁◯◯◯  VERY LOW | | | |  | |
| **Studies** | **Quality of Evidence** | | | | | **Number of participants** | | | | | | | | **Effect** | | | **Overall quality of evidence** | | | |  | |
|  | **Risk of bias** | | **Inconsistency** | **Inaccuracy** | **Indirect evidence** | | | **LLRT-BFR** | | | | **HLRT** | | | | **MD or SMD (95% CI)** | | |  | | | |
| ***SBP*** |  | | | | | | | | | | | | | | | | | | | | | |
| **mmHg** | Serious a | No serious | | Serious c | No serious | | | 80 | 80 | | | | MD= **-1.31 mmHg** (-3.74, 1.13) | | | | ⨁⨁◯◯  LOW | | |  | | |
| ***DBP*** |  |  | |  |  | | |  |  | | | |  | | | |  | | |  | | |
| **mmHg** | Serious a | Serious b | | Serious c | No serious | | | 80 | 80 | | | | MD= **3.04 mmHg** (-1.61, 7.70) | | | | ⨁◯◯◯  VERY LOW | | |  | | |
| ***MAP*** |  |  | |  |  | | |  |  | | | |  | | | |  | | |  | | |
| **mmHg** | Serious a | No serious | | Serious c | No serious | | | 56 | 56 | | | | MD= **-1.27 mmHg** (-3.28, 0.74) | | | | ⨁⨁◯◯  LOW | | |  | | |
| ***HR*** |  |  | |  |  | | |  |  | | | |  | | | |  | | |  | | |
| **bpm** | Serious a | Serious b | | Serious c | No serious | | | 86 | 86 | | | | MD= **-33.12 mmHg** (-44.79, -21.46) | | | | ⨁◯◯◯  VERY LOW | | |  | | |
| ***Double product*** |  |  | |  |  | | |  |  | | | |  | | | |  | | |  | | |
| **bpm x mmHg** | Serious a | Serious b | | Serious c | No serious | | | 58 | 58 | | | | MD= -**916.77 (bpm x mmHg)** (-2952.65, 1119.11) | | | | ⨁◯◯◯  VERY LOW | | |  | | |
| **CI: Confidence interval; DM: Mean difference; DMP: Standardized mean difference; SD: Standardized difference*;***  **a More than 25% of study participants with low methodological quality (PEDro score <6 points);**  **b I2> 50%;**  **c <400 participants combined for each outcome;**  **LOW QUALITY: It is very likely that more research will have an important impact on our confidence in the estimate of the effect and may change the estimate.**  **VERY LOW QUALITY: We are very uncertain about the estimated effect.** | | | | | | | | | | | | | | | | | | | |  | | |

| **Table 5.** Quality of evidence for continuous BFR applications between LLRT-BFR vs HLRT and LLRT-BFR vs. LLRT. | | | | | | | | | | | | | | | | | | | | | |  |
| --- | --- | --- | --- | --- | --- | --- | --- | --- | --- | --- | --- | --- | --- | --- | --- | --- | --- | --- | --- | --- | --- | --- |
|  | | | | | | | | | | | | | | | | | | | | | |  |
| **Studies** | **Quality of Evidence** | | | | | **Number of participants** | | | | | | | | **Effect** | | | **Overall quality of evidence** | | | |  | |
|  | **Risk of bias** | | **Inconsistency** | **Inaccuracy** | **Indirect evidence** | | **LLRT-BFR** | | | | **LLRT** | | | | **MD or SMD (95% CI)** | | |  | | | |  |
| ***SBP*** |  | | | | | | | | | | | | | | | | | | | | | |
| **mmHg** | Serious a | | No serious | Serious c | No serious | | 79 | | | | 67 | | | | MD= **-1.59 mmHg**  (-6.51, 3.32) | | | ⨁⨁◯◯  LOW | | | |  |
| ***DBP*** |  | | | | | | | | | | | | | | | | | | | | | |
| **mmHg** | Serious a | | No serious | Serious c | No serious | | 79 | | | | 67 | | | | MD= **3.52 mmHg**  (-0.27, 7,30) | | | ⨁⨁◯◯  LOW | | | |  |
| ***MAP*** |  | | | | | | | | | | | | | | | | | | | | | |
| **mmHg** | Serious a | | No serious | Serious c | No serious | | 42 | | | | 45 | | | | MD= **0.97 mmHg** (-3.61, 5.55) | | | ⨁⨁◯◯  LOW | | | |  |
| ***HR*** |  | |  |  | |  | | | |  | | | |  | | |  | | | |  | |
| **bpm** | Serious | | Serious b | Serious c | No serious | 27 | | | | 30 | | | | MD= **10.17 bpm** (-3.74, 24.08) | | | ⨁◯◯◯  VERY LOW | | | |  | |
| **Studies** | **Quality of Evidence** | | | | | **Number of participants** | | | | | | | | **Effect** | | | **Overall quality of evidence** | | | |  | |
|  | **Risk of bias** | | **Inconsistency** | **Inaccuracy** | **Indirect evidence** | | | **LLRT-BFR** | | | | **HLRT** | | | | **MD or SMD (95% CI)** | | |  | | | |
| ***SBP*** |  | | | | | | | | | | | | | | | | | | | | | |
| **mmHg** | Serious a | No serious | | Serious c | No serious | | | 74 | 57 | | | | MD= **0.10 mmHg** (-2.37, 2.58) | | | | ⨁⨁◯◯  LOW | | |  | | |
| ***DBP*** |  |  | |  |  | | |  |  | | | |  | | | |  | | |  | | |
| **mmHg** | Serious a | No serious | | Serious c | No serious | | | 74 | 57 | | | | MD= **4.67 mmHg** (2.15, 7.19) | | | | ⨁⨁◯◯  LOW | | |  | | |
| ***MAP*** |  |  | |  |  | | |  |  | | | |  | | | |  | | |  | | |
| **mmHg** | Serious a | No serious | | Serious c | No serious | | | 37 | 37 | | | | MD= **1.90 mmHg** (-0.04, 3.85) | | | | ⨁⨁◯◯  LOW | | |  | | |
| **CI: Confidence interval; DM: Mean difference; DMP: Standardized mean difference; SD: Standardized difference*;***  **a More than 25% of study participants with low methodological quality (PEDro score <6 points);**  **b I2> 50%;**  **c <400 participants combined for each outcome;**  **LOW QUALITY: It is very likely that more research will have an important impact on our confidence in the estimate of the effect and may change the estimate.**  **VERY LOW QUALITY: We are very uncertain about the estimated effect.** | | | | | | | | | | | | | | | | | | | |  | | |
